# Supplementary material for: Improved N2 photo-fixation performance of nanocrystalline TiO2 films by photon localization effects and Fe doping
Source: Royal Society of Chemistry journal article supplement (doi:10.1039/d3nj05332f), 2024-01-01
Supplement: d3nj05332f1.pdf [file d3nj05332f1.pdf]

## Supporting Information

# Improved N<sub>2</sub> Photo- fixation Performance of Nanocrystalline TiO<sub>2</sub> Film by Photon Localization Effect and Fe Doping

**Ying-Min Xu #, Sheng Chen #, Sheng-Li Chen \*, Ai-Jun Wang**

State Key Laboratory of Heavy Oil Processing, College of Chemical Engineering and  
Environment, China University of Petroleum, Beijing 102249, People's Republic of  
China

[#] These authors contributed equally to this work and should be considered co-first  
authors.

[\*] Corresponding author: Professor Sheng-Li Chen, Phone: 86-10-89733396, Fax: 86-  
10-69724721, Email address: slchen@cup.edu.cn , shenglichen62@163.com

## 1. Regents

Titanium tetraisopropanolate, ammonium chloride (99.5%), ammonia solution (25%-28%) and hydrazine dihydrochloride were bought from Shanghai Aladdin Biochemical Technology Co., Ltd. (China). Ferric nitrate (99.5%), ethanol ( $\geq 99.7\%$ ) and nitric acid (65%-68%) were provided by the Beijing Chemical Works (China). Tetraethoxysilane (TEOS) (98%), LUDOX AS-40 colloidal silica, Nessler, 4-dimethylaminobenzaldehyde, polyethylene glycol 2000 (PEG 2000) and acetic acid ( $\geq 99.7\%$ ) were purchased from Aldrich Chemical Co., Inc. (USA), Sigma-Aldrich Co., Tianjin Aopusheng Chemical Co., Ltd. (China), Ailan (Shanghai) Chemical Technology Co., Ltd. (China), Shanghai Titan Scientific Co., Ltd. (China) and Shanghai Macklin Biochemical Co., Ltd. (China), respectively. All the chemicals were analytical grade and could be used without further purification. All the experiments were performed with distilled water. Glass slides with a size of  $38 \times 25 \times 1$  mm were used as the catalyst substrates.

## 2. Structural and optical characterizations

Powder X-ray diffraction (XRD) patterns were acquired with a Panalytical X'Pert diffractometer. The X-ray photoelectron spectroscopy (XPS) measurements were performed with an ULTRAAXIS DLD with an Al K $\alpha$  (1253.6 eV) achromatic X-ray source. The electron paramagnetic resonance (EPR) spectrums were collected with a Bruker EMXplus spectrometer. The morphologies and structures of the materials were characterized by scanning electron microscopy (SEM, Gemini SEM 300 instrument operated at 15-30 kV). The high-resolution transmission electron microscopy (HRTEM) images were obtained on a FEI Tecnai G<sup>2</sup> F20 with an acceleration voltage of 200 kV. Nitrogen adsorption-desorption isotherms were recorded on a TriStar II 3020 nitrogen adsorption apparatus. The absorption spectra and the diffuse reflectance spectra (DRS) were measured using an UV-Vis spectrometer (UV-1800 S, Shanghai Macy Instrument Co. Ltd., China). Photoluminescence (PL) spectroscopy measurements were conducted with a Hitachi F-7000 Fluorescence Spectrophotometer with a xenon lamp ( $\lambda = 280$  nm). The transient photocurrents were

analyzed by using a CHI-660E electrochemical workstation equipped with a standard three-electrode system in 0.5 M·L<sup>-1</sup> Na<sub>2</sub>SO<sub>4</sub> solution. The sizes of microspheres were measured by dynamic light scattering (DLS) on a Malvern Zetasizer Nano ZS90.

### 3. The apparent quantum efficiency

According to the N<sub>2</sub> reduction reaction, the apparent quantum efficiency (AQE) is calculated through the following Eq. (S1):

$$\begin{aligned}
 AQE &= \frac{\text{Number of reacted electrons}}{\text{Number of incident photons}} \times 100\% \\
 &= \frac{6 \times \text{number of generated NH}_3 \text{ molecules}}{\text{Number of incident photons}} \times 100\% \\
 &= \frac{6N_A M h c}{I S t \lambda} \times 100\%
 \end{aligned} \tag{S1}$$

where  $N_A$ ,  $M$ ,  $h$ ,  $c$  are Avogadro's constant, mole number of generated NH<sub>3</sub>, Planck constant and speed of light, respectively;  $I$ ,  $S$ ,  $t$  and  $\lambda$  are light density, irradiation area, irradiation time and wavelength of monochromatic light, respectively.

### 4. DFT calculations

All chemical simulation calculations were performed within the framework of density functional theory (DFT) using the DMol<sup>3</sup> module in Materials Studio 2020 software. The Perdew-Burke-Ernzerhof (PBE) functional within the generalized gradient approximation (GGA) method was selected to describe exchange-correlation energy of atom. The DFT semi-core pseudopotential (DSPP) was applied for core treatment and adopting double numerical plus polarization (DNP) basis set. The k-point was chosen as 2×2×1, and the self-consistent field (SCF) was set to 10<sup>-5</sup> eV. A vacuum layer of 20 Å was applied. Three layers of the subsurface TiO<sub>2</sub> (101) was fixed in all the calculations.

The adsorption energy of N<sub>2</sub> was calculated with Eq. (S2):

$$E_{ads} = E_{N_2-slab} - (E_{N_2} + E_{slab}) \tag{S2}$$

where  $E_{N_2-slab}$  is the energy of N<sub>2</sub> adsorbed on slab (the constructed material model),  $E_{N_2}$  is the energy of N<sub>2</sub> molecule (-10.73 eV),  $E_{slab}$  is the energy of slab. The more

negative the absorption energy, the stronger the adsorption.

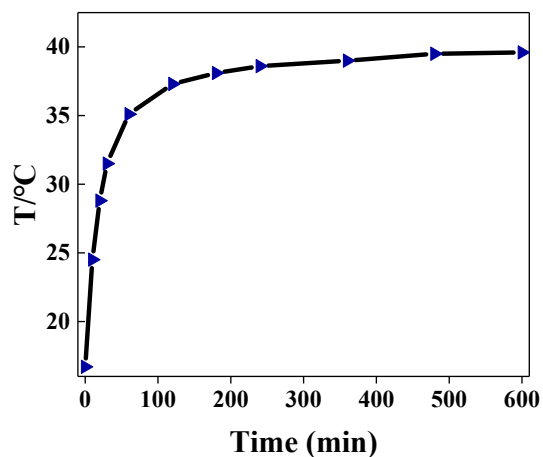

Fig. S1. The change of reaction temperature with time.

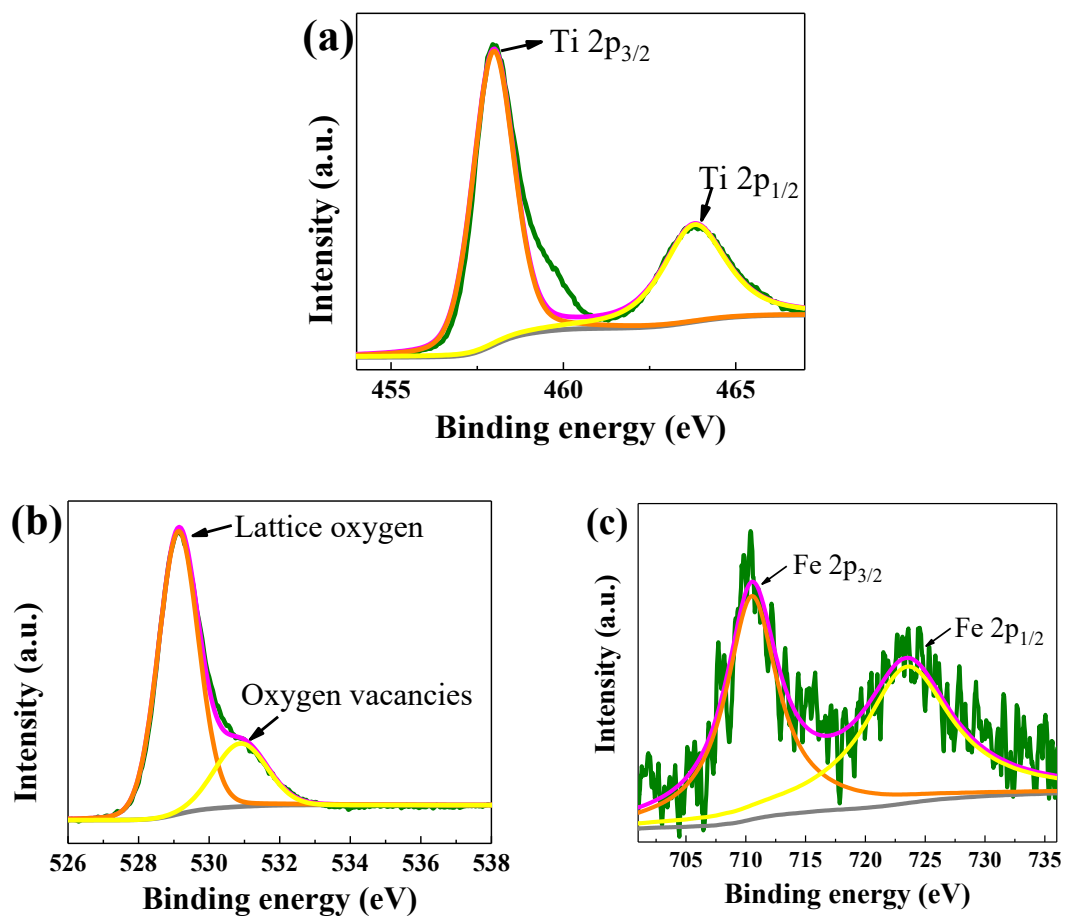

Fig. S2. XPS spectra of Ti 2p (a), O 1s (b) and Fe 2p (c) of 6% FT sample.

**Table S1.** Nitrogen Fixation Rate of Various Photocatalysts for N<sub>2</sub> Photo-fixation

| Catalyst                                           | Light Source            | Hole scavenger                 | Ammonia production rate                                   | Ref.      |
|----------------------------------------------------|-------------------------|--------------------------------|-----------------------------------------------------------|-----------|
| Single-atom Fe- TiO <sub>2</sub> -SiO <sub>2</sub> | 300 W Xe lamp           | No                             | 32 μmol·g <sub>cat</sub> <sup>-1</sup> ·h <sup>-1</sup>   | 29        |
| Fe-abtc                                            | 300 W Xe lamp           | K <sub>2</sub> SO <sub>3</sub> | 49.8 μmol·g <sub>cat</sub> <sup>-1</sup> ·h <sup>-1</sup> | 33        |
| Fe-Based MOFs [MIL-101(Fe)]                        | 300 W Xe lamp           | No                             | 50.4 μmol·L <sup>-1</sup> ·h <sup>-1</sup>                | 34        |
| Fe-TiO <sub>2</sub> /Au                            | 300 W Xe lamp (λ>420nm) | No                             | 22.4 μmol·g <sub>cat</sub> <sup>-1</sup> ·h <sup>-1</sup> | 36        |
| Fe-BiOBr                                           | 300 W Xe lamp (λ>420nm) | No                             | 382.7 μmol·L <sup>-1</sup> ·h <sup>-1</sup>               | 37        |
| TiO <sub>2</sub> -1500r/SiO <sub>2</sub> PC-370nm  | 500 W Xe lamp           | No                             | 31 μmol·g <sub>cat</sub> <sup>-1</sup> ·h <sup>-1</sup>   | 50        |
| 6% FT/SOPC-380                                     | 500 W Xe lamp           | No                             | 55.6 μmol·g <sub>cat</sub> <sup>-1</sup> ·h <sup>-1</sup> | this work |

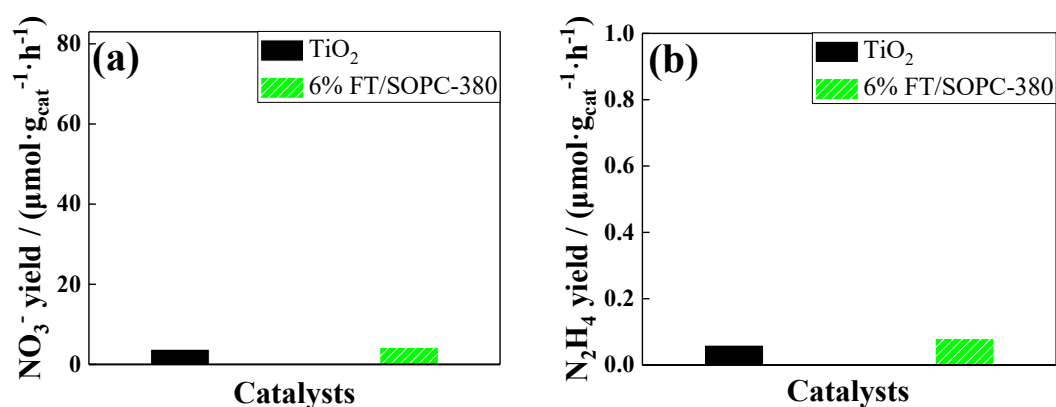

**Fig. S3.** (a) Nitrate formed in phototatalytic reactions over TiO<sub>2</sub> and 6% FT/SOPC-380 catalysts; (b) hydrazine formed in phototatalytic reactions over TiO<sub>2</sub> and 6% FT/SOPC-380 catalysts. Reaction conditions: pure water (60 mL), catalyst (38 cm<sup>2</sup>); light irradiation conditions: full-spectrum, 2.8 mW·cm<sup>2</sup>.

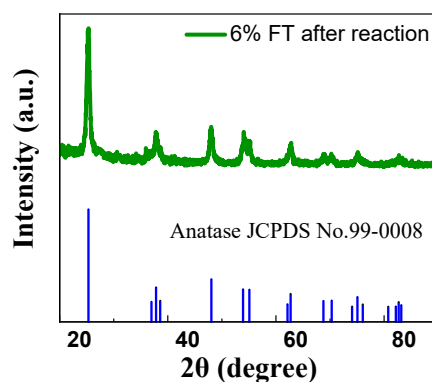

Fig. S4. X-ray diffraction diagrams of 6% FT after reaction.

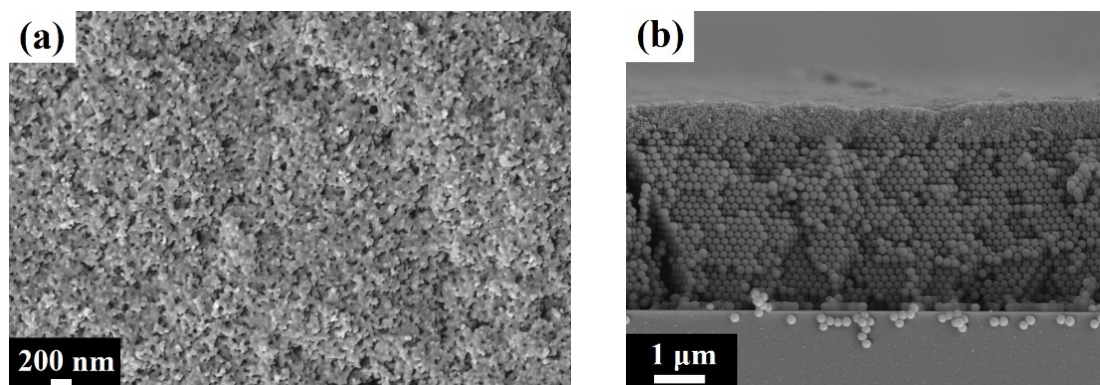

Fig. S5. SEM images of the top view and cross sectional view of 6% FT/SOPC after reaction.

Table S2. DFT Calculation Results of Nitrogen Adsorption.

| Slab                           | E / eV  | Slab                                           | E / eV  |
|--------------------------------|---------|------------------------------------------------|---------|
| TiO <sub>2</sub> (101)         | -768.52 | N <sub>2</sub> _TiO <sub>2</sub> (101)         | -779.79 |
| Fe_TiO <sub>2</sub> (101)      | -761.11 | N <sub>2</sub> _Fe_TiO <sub>2</sub> (101) OV-1 | -772.47 |
| Energy                         | E / eV  | Adsorption type                                |         |
| E <sub>ads-TiO2</sub> (101)    | -0.52   | parallel                                       |         |
| E <sub>ads-Fe_TiO2</sub> (101) | -0.63   | parallel                                       |         |

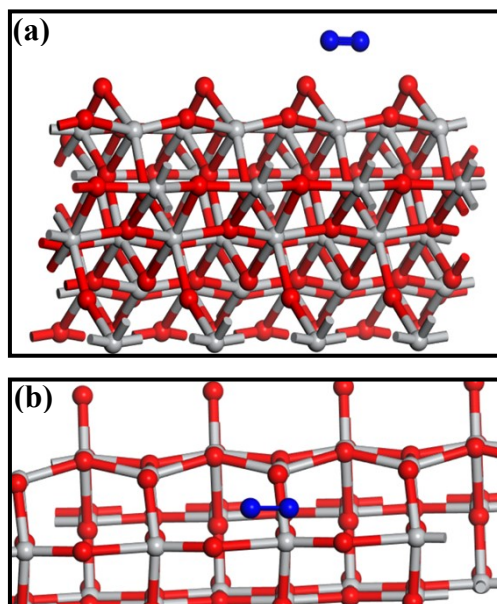

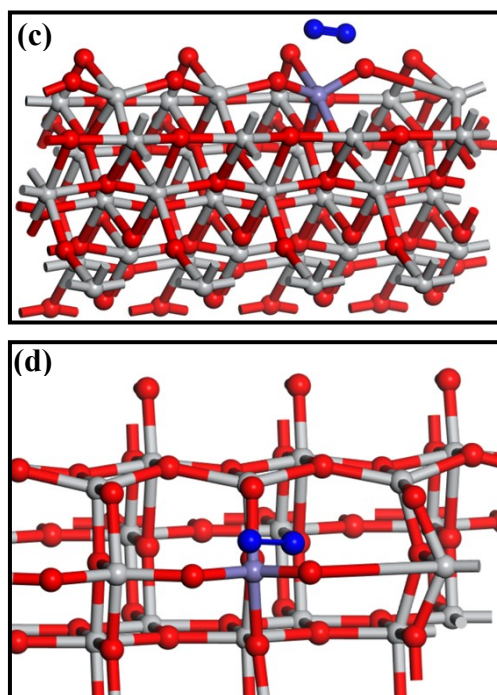

**Fig. S6.** Front-view (a) and top view (b) images of  $\text{N}_2$ \_TiO<sub>2</sub> (101) models; front view (a) and top view (b) images of  $\text{N}_2$ \_Fe\_TiO<sub>2</sub> (101) models. Ti, O, Fe and N atoms are shown in grey, red, purple and blue color, respectively.
